# Supplementary material for: Synthesis of ZnxCd1-xSe@ZnO Hollow Spheres in Different Sizes for Quantum Dots Sensitized Solar Cells Application
Source: MDPI journal article supplement (doi:10.3390/nano9020132), 2019-01-22
Supplement: s1 [file s1]

# Synthesis of $Zn_xCd_{1-x}Se@ZnO$ Hollow Spheres in Different Sizes for Quantum Dots Sensitized Solar Cells Application

Libo Yu <sup>1</sup> and Zhen Li <sup>1,2,\*</sup>

<sup>1</sup> College of Chemistry and Chemical Engineering, Hexi University, Zhangye City 734000, Gansu Province, China; yulibo\_665@163.com

<sup>2</sup> Key Laboratory of Hexi Corridor Resources Utilization of Gansu, Hexi University, Zhangye City 734000, Gansu Province, China; lizhen\_665@163.com

\* Correspondence: lizhen\_665@163.com

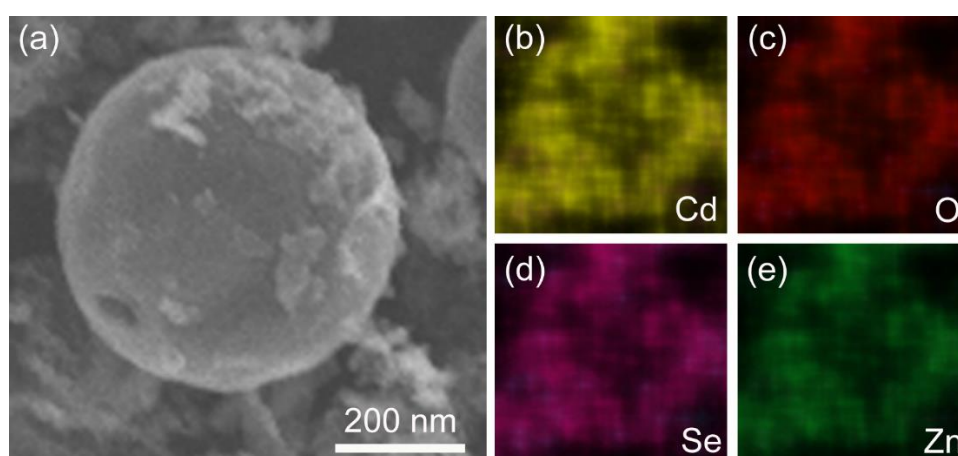

**Figure S1.** (a) SEM image  $Zn_xCd_{1-x}Se@ZnO$  hollow sphere; (b–e) elemental mapping of  $Zn_xCd_{1-x}Se@ZnO$  hollow sphere.

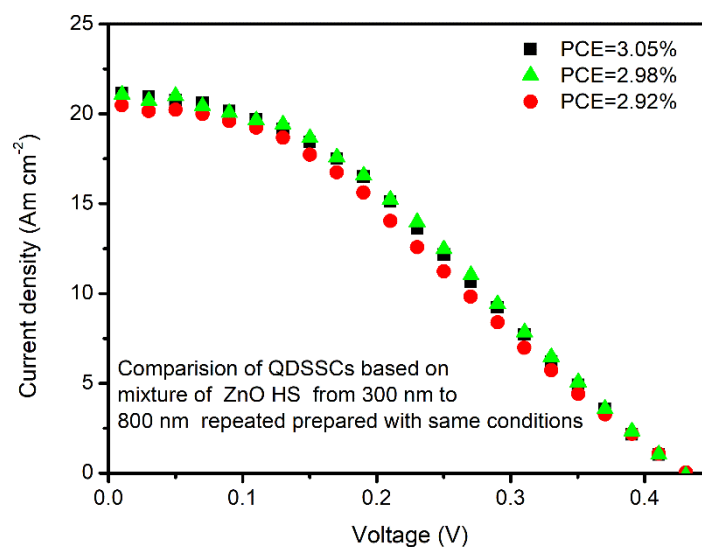

**Figure S2.** I–V curves QDSSCs based on mixture of ZnO HS from 300 nm to 800 nm (three QDSSCs are repeatedly prepared with same conditions for comparisons and reproducibility check).
